# Supplementary material
Source: Springer Nature journal article supplement (https://www.springermedizin.de/resource/supplementary/12889_2005_464_MOESM6_ESM.pdf/9500926)
Supplement: MOESM6 [file 9500926]

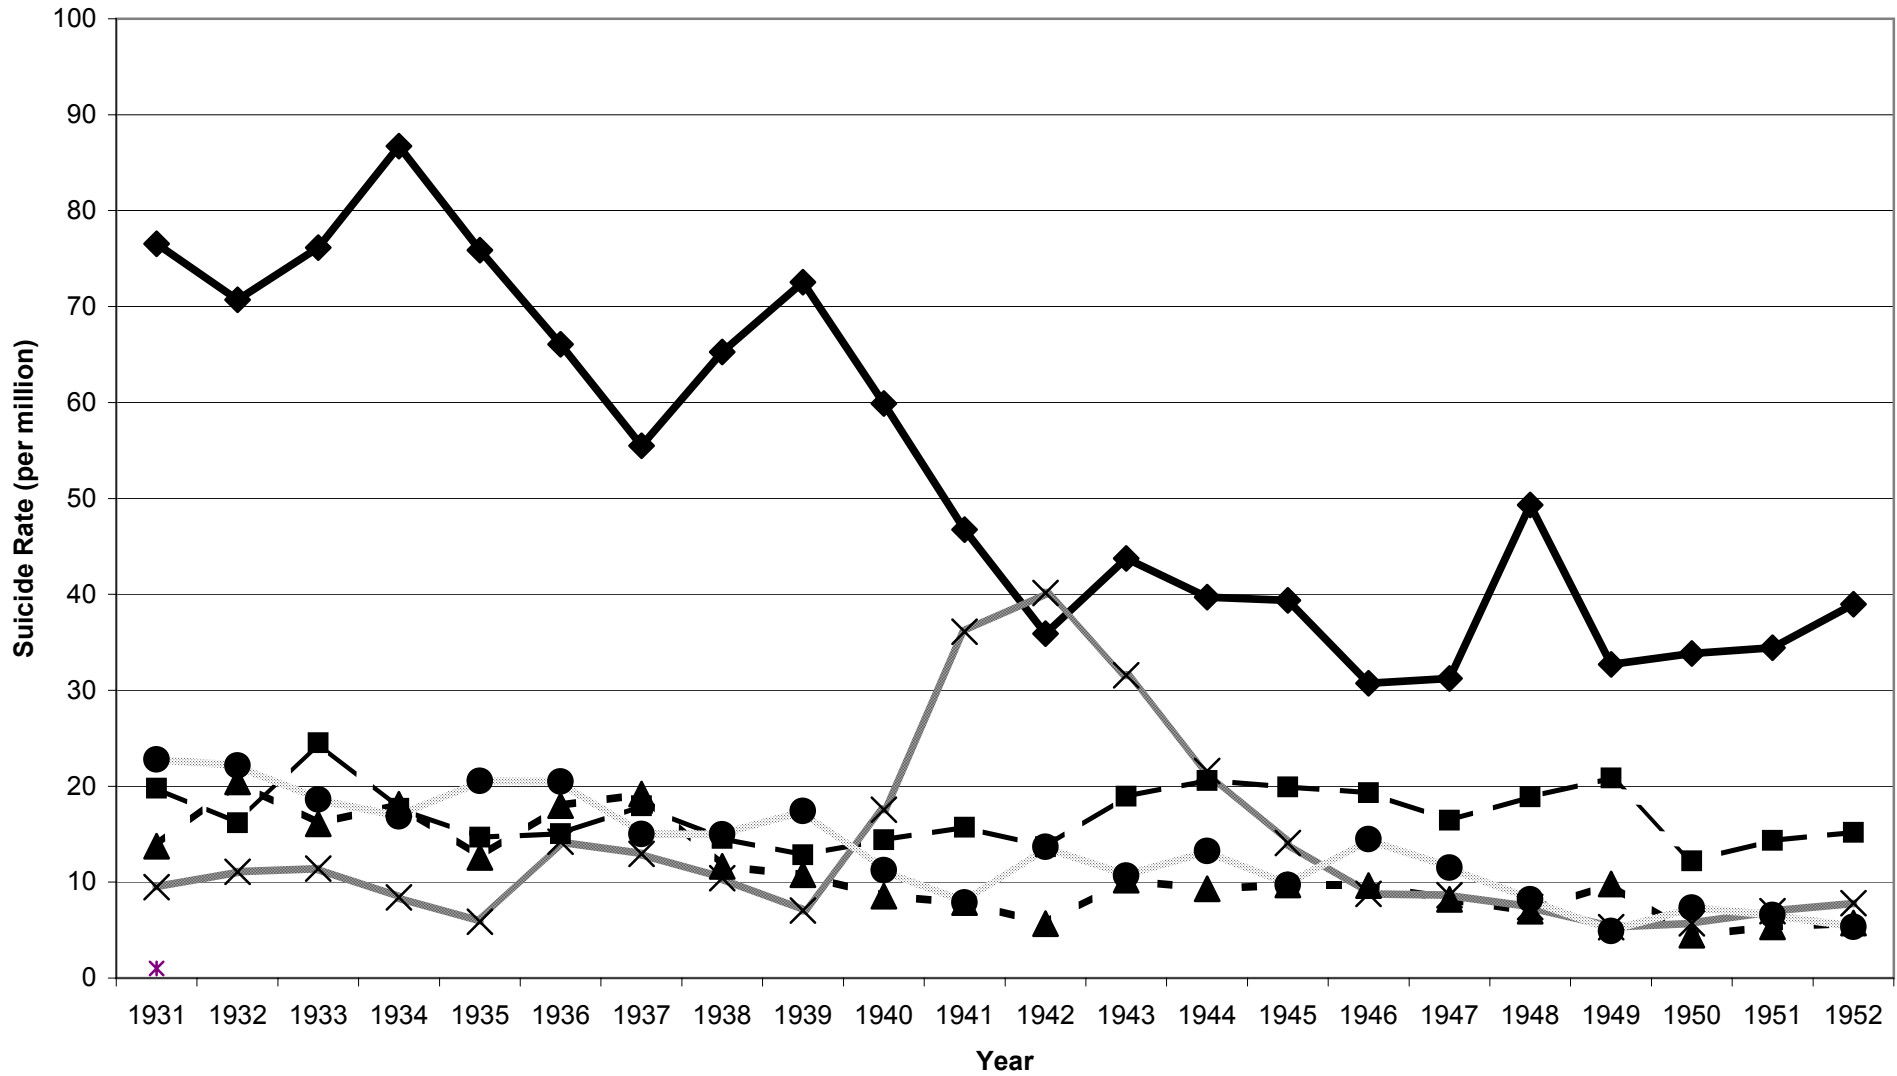

Poisoning
  Hanging, strangulation & suffocation
  Drowning
  Firearms & explosives
  Cutting & piercing instruments
